# Supplementary material for: Subviral Dense Bodies of Human Cytomegalovirus Induce an Antiviral Type I Interferon Response
Source: MDPI journal article supplement (doi:10.3390/cells11244028), 2022-12-13
Supplement: s1 [file s1]

Penner et al., Suppl. Table S1

|                                                 |  |                                                   |  |  |  |  |  |               |  |
|-------------------------------------------------|--|---------------------------------------------------|--|--|--|--|--|---------------|--|
| P1: Up- and downregulated protein groups        |  |                                                   |  |  |  |  |  |               |  |
| Regulated protein groups 24h after DBs exposure |  |                                                   |  |  |  |  |  |               |  |
| Threshold:                                      |  | log2Ratio 0.58 in minimum one of the 2 replicates |  |  |  |  |  | upregulated   |  |
|                                                 |  | log2Ratio 0.58 = fold increase of 1.5             |  |  |  |  |  | downregulated |  |
|                                                 |  |                                                   |  |  |  |  |  |               |  |
|                                                 |  |                                                   |  |  |  |  |  |               |  |
|                                                 |  |                                                   |  |  |  |  |  |               |  |
|                                                 |  |                                                   |  |  |  |  |  |               |  |
|                                                 |  |                                                   |  |  |  |  |  |               |  |
|                                                 |  |                                                   |  |  |  |  |  |               |  |
|                                                 |  |                                                   |  |  |  |  |  |               |  |
|                                                 |  |                                                   |  |  |  |  |  |               |  |
|                                                 |  |                                                   |  |  |  |  |  |               |  |
|                                                 |  |                                                   |  |  |  |  |  |               |  |
|                                                 |  |                                                   |  |  |  |  |  |               |  |
|                                                 |  |                                                   |  |  |  |  |  |               |  |
|                                                 |  |                                                   |  |  |  |  |  |               |  |
|                                                 |  |                                                   |  |  |  |  |  |               |  |
|                                                 |  |                                                   |  |  |  |  |  |               |  |
|                                                 |  |                                                   |  |  |  |  |  |               |  |
|                                                 |  |                                                   |  |  |  |  |  |               |  |
|                                                 |  |                                                   |  |  |  |  |  |               |  |
|                                                 |  |                                                   |  |  |  |  |  |               |  |
|                                                 |  |                                                   |  |  |  |  |  |               |  |
|                                                 |  |                                                   |  |  |  |  |  |               |  |
|                                                 |  |                                                   |  |  |  |  |  |               |  |
|                                                 |  |                                                   |  |  |  |  |  |               |  |
|                                                 |  |                                                   |  |  |  |  |  |               |  |
|                                                 |  |                                                   |  |  |  |  |  |               |  |
|                                                 |  |                                                   |  |  |  |  |  |               |  |
|                                                 |  |                                                   |  |  |  |  |  |               |  |
|                                                 |  |                                                   |  |  |  |  |  |               |  |
|                                                 |  |                                                   |  |  |  |  |  |               |  |
|                                                 |  |                                                   |  |  |  |  |  |               |  |
|                                                 |  |                                                   |  |  |  |  |  |               |  |
|                                                 |  |                                                   |  |  |  |  |  |               |  |
|                                                 |  |                                                   |  |  |  |  |  |               |  |
|                                                 |  |                                                   |  |  |  |  |  |               |  |
|                                                 |  |                                                   |  |  |  |  |  |               |  |
|                                                 |  |                                                   |  |  |  |  |  |               |  |
|                                                 |  |                                                   |  |  |  |  |  |               |  |
|                                                 |  |                                                   |  |  |  |  |  |               |  |
|                                                 |  |                                                   |  |  |  |  |  |               |  |
|                                                 |  |                                                   |  |  |  |  |  |               |  |
|                                                 |  |                                                   |  |  |  |  |  |               |  |
|                                                 |  |                                                   |  |  |  |  |  |               |  |
|                                                 |  |                                                   |  |  |  |  |  |               |  |
|                                                 |  |                                                   |  |  |  |  |  |               |  |
|                                                 |  |                                                   |  |  |  |  |  |               |  |
|                                                 |  |                                                   |  |  |  |  |  |               |  |
|                                                 |  |                                                   |  |  |  |  |  |               |  |
|                                                 |  |                                                   |  |  |  |  |  |               |  |
|                                                 |  |                                                   |  |  |  |  |  |               |  |
|                                                 |  |                                                   |  |  |  |  |  |               |  |
|                                                 |  |                                                   |  |  |  |  |  |               |  |
|                                                 |  |                                                   |  |  |  |  |  |               |  |
|                                                 |  |                                                   |  |  |  |  |  |               |  |
|                                                 |  |                                                   |  |  |  |  |  |               |  |
|                                                 |  |                                                   |  |  |  |  |  |               |  |
|                                                 |  |                                                   |  |  |  |  |  |               |  |
|                                                 |  |                                                   |  |  |  |  |  |               |  |
|                                                 |  |                                                   |  |  |  |  |  |               |  |
|                                                 |  |                                                   |  |  |  |  |  |               |  |
|                                                 |  |                                                   |  |  |  |  |  |               |  |
|                                                 |  |                                                   |  |  |  |  |  |               |  |
|                                                 |  |                                                   |  |  |  |  |  |               |  |
|                                                 |  |                                                   |  |  |  |  |  |               |  |
|                                                 |  |                                                   |  |  |  |  |  |               |  |
|                                                 |  |                                                   |  |  |  |  |  |               |  |
|                                                 |  |                                                   |  |  |  |  |  |               |  |
|                                                 |  |                                                   |  |  |  |  |  |               |  |
|                                                 |  |                                                   |  |  |  |  |  |               |  |
|                                                 |  |                                                   |  |  |  |  |  |               |  |
|                                                 |  |                                                   |  |  |  |  |  |               |  |
|                                                 |  |                                                   |  |  |  |  |  |               |  |
|                                                 |  |                                                   |  |  |  |  |  |               |  |
|                                                 |  |                                                   |  |  |  |  |  |               |  |
|                                                 |  |                                                   |  |  |  |  |  |               |  |
|                                                 |  |                                                   |  |  |  |  |  |               |  |
|                                                 |  |                                                   |  |  |  |  |  |               |  |
|                                                 |  |                                                   |  |  |  |  |  |               |  |
|                                                 |  |                                                   |  |  |  |  |  |               |  |
|                                                 |  |                                                   |  |  |  |  |  |               |  |
|                                                 |  |                                                   |  |  |  |  |  |               |  |
|                                                 |  |                                                   |  |  |  |  |  |               |  |
|                                                 |  |                                                   |  |  |  |  |  |               |  |
|                                                 |  |                                                   |  |  |  |  |  |               |  |
|                                                 |  |                                                   |  |  |  |  |  |               |  |
|                                                 |  |                                                   |  |  |  |  |  |               |  |
|                                                 |  |                                                   |  |  |  |  |  |               |  |
|                                                 |  |                                                   |  |  |  |  |  |               |  |
|                                                 |  |                                                   |  |  |  |  |  |               |  |
|                                                 |  |                                                   |  |  |  |  |  |               |  |
|                                                 |  |                                                   |  |  |  |  |  |               |  |
|                                                 |  |                                                   |  |  |  |  |  |               |  |
|                                                 |  |                                                   |  |  |  |  |  |               |  |
|                                                 |  |                                                   |  |  |  |  |  |               |  |
|                                                 |  |                                                   |  |  |  |  |  |               |  |
|                                                 |  |                                                   |  |  |  |  |  |               |  |
|                                                 |  |                                                   |  |  |  |  |  |               |  |
|                                                 |  |                                                   |  |  |  |  |  |               |  |
|                                                 |  |                                                   |  |  |  |  |  |               |  |
|                                                 |  |                                                   |  |  |  |  |  |               |  |
|                                                 |  |                                                   |  |  |  |  |  |               |  |
|                                                 |  |                                                   |  |  |  |  |  |               |  |
|                                                 |  |                                                   |  |  |  |  |  |               |  |
|                                                 |  |                                                   |  |  |  |  |  |               |  |
|                                                 |  |                                                   |  |  |  |  |  |               |  |
|                                                 |  |                                                   |  |  |  |  |  |               |  |
|                                                 |  |                                                   |  |  |  |  |  |               |  |
|                                                 |  |                                                   |  |  |  |  |  |               |  |
|                                                 |  |                                                   |  |  |  |  |  |               |  |
|                                                 |  |                                                   |  |  |  |  |  |               |  |
|                                                 |  |                                                   |  |  |  |  |  |               |  |
|                                                 |  |                                                   |  |  |  |  |  |               |  |
|                                                 |  |                                                   |  |  |  |  |  |               |  |
|                                                 |  |                                                   |  |  |  |  |  |               |  |
|                                                 |  |                                                   |  |  |  |  |  |               |  |
|                                                 |  |                                                   |  |  |  |  |  |               |  |
|                                                 |  |                                                   |  |  |  |  |  |               |  |
|                                                 |  |                                                   |  |  |  |  |  |               |  |
|                                                 |  |                                                   |  |  |  |  |  |               |  |
|                                                 |  |                                                   |  |  |  |  |  |               |  |
|                                                 |  |                                                   |  |  |  |  |  |               |  |
|                                                 |  |                                                   |  |  |  |  |  |               |  |
|                                                 |  |                                                   |  |  |  |  |  |               |  |
|                                                 |  |                                                   |  |  |  |  |  |               |  |
|                                                 |  |                                                   |  |  |  |  |  |               |  |
|                                                 |  |                                                   |  |  |  |  |  |               |  |
|                                                 |  |                                                   |  |  |  |  |  |               |  |
|                                                 |  |                                                   |  |  |  |  |  |               |  |
|                                                 |  |                                                   |  |  |  |  |  |               |  |
|                                                 |  |                                                   |  |  |  |  |  |               |  |
|                                                 |  |                                                   |  |  |  |  |  |               |  |
|                                                 |  |                                                   |  |  |  |  |  |               |  |
|                                                 |  |                                                   |  |  |  |  |  |               |  |
|                                                 |  |                                                   |  |  |  |  |  |               |  |
|                                                 |  |                                                   |  |  |  |  |  |               |  |
|                                                 |  |                                                   |  |  |  |  |  |               |  |
|                                                 |  |                                                   |  |  |  |  |  |               |  |
|                                                 |  |                                                   |  |  |  |  |  |               |  |
|                                                 |  |                                                   |  |  |  |  |  |               |  |
|                                                 |  |                                                   |  |  |  |  |  |               |  |
|                                                 |  |                                                   |  |  |  |  |  |               |  |
|                                                 |  |                                                   |  |  |  |  |  |               |  |
|                                                 |  |                                                   |  |  |  |  |  |               |  |
|                                                 |  |                                                   |  |  |  |  |  |               |  |
|                                                 |  |                                                   |  |  |  |  |  |               |  |
|                                                 |  |                                                   |  |  |  |  |  |               |  |
|                                                 |  |                                                   |  |  |  |  |  |               |  |
|                                                 |  |                                                   |  |  |  |  |  |               |  |
|                                                 |  |                                                   |  |  |  |  |  |               |  |
|                                                 |  |                                                   |  |  |  |  |  |               |  |
|                                                 |  |                                                   |  |  |  |  |  |               |  |
|                                                 |  |                                                   |  |  |  |  |  |               |  |
|                                                 |  |                                                   |  |  |  |  |  |               |  |
|                                                 |  |                                                   |  |  |  |  |  |               |  |
|                                                 |  |                                                   |  |  |  |  |  |               |  |
|                                                 |  |                                                   |  |  |  |  |  |               |  |
|                                                 |  |                                                   |  |  |  |  |  |               |  |
|                                                 |  |                                                   |  |  |  |  |  |               |  |
|                                                 |  |                                                   |  |  |  |  |  |               |  |
|                                                 |  |                                                   |  |  |  |  |  |               |  |
|                                                 |  |                                                   |  |  |  |  |  |               |  |
|                                                 |  |                                                   |  |  |  |  |  |               |  |
|                                                 |  |                                                   |  |  |  |  |  |               |  |
|                                                 |  |                                                   |  |  |  |  |  |               |  |
|                                                 |  |                                                   |  |  |  |  |  |               |  |
|                                                 |  |                                                   |  |  |  |  |  |               |  |
|                                                 |  |                                                   |  |  |  |  |  |               |  |
|                                                 |  |                                                   |  |  |  |  |  |               |  |
|                                                 |  |                                                   |  |  |  |  |  |               |  |
|                                                 |  |                                                   |  |  |  |  |  |               |  |
|                                                 |  |                                                   |  |  |  |  |  |               |  |
|                                                 |  |                                                   |  |  |  |  |  |               |  |
|                                                 |  |                                                   |  |  |  |  |  |               |  |
|                                                 |  |                                                   |  |  |  |  |  |               |  |
|                                                 |  |                                                   |  |  |  |  |  |               |  |
|                                                 |  |                                                   |  |  |  |  |  |               |  |
|                                                 |  |                                                   |  |  |  |  |  |               |  |
|                                                 |  |                                                   |  |  |  |  |  |               |  |
|                                                 |  |                                                   |  |  |  |  |  |               |  |
|                                                 |  |                                                   |  |  |  |  |  |               |  |
|                                                 |  |                                                   |  |  |  |  |  |               |  |
|                                                 |  |                                                   |  |  |  |  |  |               |  |
|                                                 |  |                                                   |  |  |  |  |  |               |  |
|                                                 |  |                                                   |  |  |  |  |  |               |  |
|                                                 |  |                                                   |  |  |  |  |  |               |  |
|                                                 |  |                                                   |  |  |  |  |  |               |  |
|                                                 |  |                                                   |  |  |  |  |  |               |  |
|                                                 |  |                                                   |  |  |  |  |  |               |  |
|                                                 |  |                                                   |  |  |  |  |  |               |  |
|                                                 |  |                                                   |  |  |  |  |  |               |  |
|                                                 |  |                                                   |  |  |  |  |  |               |  |
|                                                 |  |                                                   |  |  |  |  |  |               |  |
|                                                 |  |                                                   |  |  |  |  |  |               |  |
|                                                 |  |                                                   |  |  |  |  |  |               |  |
|                                                 |  |                                                   |  |  |  |  |  |               |  |
|                                                 |  |                                                   |  |  |  |  |  |               |  |
|                                                 |  |                                                   |  |  |  |  |  |               |  |
|                                                 |  |                                                   |  |  |  |  |  |               |  |
|                                                 |  |                                                   |  |  |  |  |  |               |  |
|                                                 |  |                                                   |  |  |  |  |  |               |  |
|                                                 |  |                                                   |  |  |  |  |  |               |  |
|                                                 |  |                                                   |  |  |  |  |  |               |  |
|                                                 |  |                                                   |  |  |  |  |  |               |  |
|                                                 |  |                                                   |  |  |  |  |  |               |  |
|                                                 |  |                                                   |  |  |  |  |  |               |  |
|                                                 |  |                                                   |  |  |  |  |  |               |  |
|                                                 |  |                                                   |  |  |  |  |  |               |  |
|                                                 |  |                                                   |  |  |  |  |  |               |  |
|                                                 |  |                                                   |  |  |  |  |  |               |  |
|                                                 |  |                                                   |  |  |  |  |  |               |  |
|                                                 |  |                                                   |  |  |  |  |  |               |  |
|                                                 |  |                                                   |  |  |  |  |  |               |  |
|                                                 |  |                                                   |  |  |  |  |  |               |  |
|                                                 |  |                                                   |  |  |  |  |  |               |  |
|                                                 |  |                                                   |  |  |  |  |  |               |  |
|                                                 |  |                                                   |  |  |  |  |  |               |  |
|                                                 |  |                                                   |  |  |  |  |  |               |  |
|                                                 |  |                                                   |  |  |  |  |  |               |  |
|                                                 |  |                                                   |  |  |  |  |  |               |  |
|                                                 |  |                                                   |  |  |  |  |  |               |  |
|                                                 |  |                                                   |  |  |  |  |  |               |  |
|                                                 |  |                                                   |  |  |  |  |  |               |  |
|                                                 |  |                                                   |  |  |  |  |  |               |  |
|                                                 |  |                                                   |  |  |  |  |  |               |  |
|                                                 |  |                                                   |  |  |  |  |  |               |  |
|                                                 |  |                                                   |  |  |  |  |  |               |  |
|                                                 |  |                                                   |  |  |  |  |  |               |  |
|                                                 |  |                                                   |  |  |  |  |  |               |  |
|                                                 |  |                                                   |  |  |  |  |  |               |  |
|                                                 |  |                                                   |  |  |  |  |  |               |  |
|                                                 |  |                                                   |  |  |  |  |  |               |  |
|                                                 |  |                                                   |  |  |  |  |  |               |  |
|                                                 |  |                                                   |  |  |  |  |  |               |  |
|                                                 |  |                                                   |  |  |  |  |  |               |  |
|                                                 |  |                                                   |  |  |  |  |  |               |  |
|                                                 |  |                                                   |  |  |  |  |  |               |  |
|                                                 |  |                                                   |  |  |  |  |  |               |  |
|                                                 |  |                                                   |  |  |  |  |  |               |  |
|                                                 |  |                                                   |  |  |  |  |  |               |  |
|                                                 |  |                                                   |  |  |  |  |  |               |  |
|                                                 |  |                                                   |  |  |  |  |  |               |  |
|                                                 |  |                                                   |  |  |  |  |  |               |  |
|                                                 |  |                                                   |  |  |  |  |  |               |  |
|                                                 |  |                                                   |  |  |  |  |  |               |  |
|                                                 |  |                                                   |  |  |  |  |  |               |  |
|                                                 |  |                                                   |  |  |  |  |  |               |  |
|                                                 |  |                                                   |  |  |  |  |  |               |  |
|                                                 |  |                                                   |  |  |  |  |  |               |  |
|                                                 |  |                                                   |  |  |  |  |  |               |  |
|                                                 |  |                                                   |  |  |  |  |  |               |  |
|                                                 |  |                                                   |  |  |  |  |  |               |  |
|                                                 |  |                                                   |  |  |  |  |  |               |  |
|                                                 |  |                                                   |  |  |  |  |  |               |  |
|                                                 |  |                                                   |  |  |  |  |  |               |  |
|                                                 |  |                                                   |  |  |  |  |  |               |  |
|                                                 |  |                                                   |  |  |  |  |  |               |  |
|                                                 |  |                                                   |  |  |  |  |  |               |  |
|                                                 |  |                                                   |  |  |  |  |  |               |  |
|                                                 |  |                                                   |  |  |  |  |  |               |  |
|                                                 |  |                                                   |  |  |  |  |  |               |  |
|                                                 |  |                                                   |  |  |  |  |  |               |  |
|                                                 |  |                                                   |  |  |  |  |  |               |  |
|                                                 |  |                                                   |  |  |  |  |  |               |  |
|                                                 |  |                                                   |  |  |  |  |  |               |  |
|                                                 |  |                                                   |  |  |  |  |  |               |  |
|                                                 |  |                                                   |  |  |  |  |  |               |  |
|                                                 |  |                                                   |  |  |  |  |  |               |  |
|                                                 |  |                                                   |  |  |  |  |  |               |  |
|                                                 |  |                                                   |  |  |  |  |  |               |  |
|                                                 |  |                                                   |  |  |  |  |  |               |  |
|                                                 |  |                                                   |  |  |  |  |  |               |  |
|                                                 |  |                                                   |  |  |  |  |  |               |  |
|                                                 |  |                                                   |  |  |  |  |  |               |  |
|                                                 |  |                                                   |  |  |  |  |  |               |  |
|                                                 |  |                                                   |  |  |  |  |  |               |  |
|                                                 |  |                                                   |  |  |  |  |  |               |  |
|                                                 |  |                                                   |  |  |  |  |  |               |  |
|                                                 |  |                                                   |  |  |  |  |  |               |  |
|                                                 |  |                                                   |  |  |  |  |  |               |  |
|                                                 |  |                                                   |  |  |  |  |  |               |  |
|                                                 |  |                                                   |  |  |  |  |  |               |  |
|                                                 |  |                                                   |  |  |  |  |  |               |  |
|                                                 |  |                                                   |  |  |  |  |  |               |  |
|                                                 |  |                                                   |  |  |  |  |  |               |  |
|                                                 |  |                                                   |  |  |  |  |  |               |  |
|                                                 |  |                                                   |  |  |  |  |  |               |  |
|                                                 |  |                                                   |  |  |  |  |  |               |  |
|                                                 |  |                                                   |  |  |  |  |  |               |  |
|                                                 |  |                                                   |  |  |  |  |  |               |  |
|                                                 |  |                                                   |  |  |  |  |  |               |  |
|                                                 |  |                                                   |  |  |  |  |  |               |  |
|                                                 |  |                                                   |  |  |  |  |  |               |  |
|                                                 |  |                                                   |  |  |  |  |  |               |  |
|                                                 |  |                                                   |  |  |  |  |  |               |  |
|                                                 |  |                                                   |  |  |  |  |  |               |  |
|                                                 |  |                                                   |  |  |  |  |  |               |  |
|                                                 |  |                                                   |  |  |  |  |  |               |  |
|                                                 |  |                                                   |  |  |  |  |  |               |  |
|                                                 |  |                                                   |  |  |  |  |  |               |  |
|                                                 |  |                                                   |  |  |  |  |  |               |  |
|                                                 |  |                                                   |  |  |  |  |  |               |  |
|                                                 |  |                                                   |  |  |  |  |  |               |  |
|                                                 |  |                                                   |  |  |  |  |  |               |  |
|                                                 |  |                                                   |  |  |  |  |  |               |  |
|                                                 |  |                                                   |  |  |  |  |  |               |  |
|                                                 |  |                                                   |  |  |  |  |  |               |  |
|                                                 |  |                                                   |  |  |  |  |  |               |  |
|                                                 |  |                                                   |  |  |  |  |  |               |  |
|                                                 |  |                                                   |  |  |  |  |  |               |  |
|                                                 |  |                                                   |  |  |  |  |  |               |  |
|                                                 |  |                                                   |  |  |  |  |  |               |  |
|                                                 |  |                                                   |  |  |  |  |  |               |  |
|                                                 |  |                                                   |  |  |  |  |  |               |  |
|                                                 |  |                                                   |  |  |  |  |  |               |  |
|                                                 |  |                                                   |  |  |  |  |  |               |  |
|                                                 |  |                                                   |  |  |  |  |  |               |  |
|                                                 |  |                                                   |  |  |  |  |  |               |  |
|                                                 |  |                                                   |  |  |  |  |  |               |  |
|                                                 |  |                                                   |  |  |  |  |  |               |  |
|                                                 |  |                                                   |  |  |  |  |  |               |  |
|                                                 |  |                                                   |  |  |  |  |  |               |  |
|                                                 |  |                                                   |  |  |  |  |  |               |  |
|                                                 |  |                                                   |  |  |  |  |  |               |  |
|                                                 |  |                                                   |  |  |  |  |  |               |  |
|                                                 |  |                                                   |  |  |  |  |  |               |  |
|                                                 |  |                                                   |  |  |  |  |  |               |  |
|                                                 |  |                                                   |  |  |  |  |  |               |  |
|                                                 |  |                                                   |  |  |  |  |  |               |  |
|                                                 |  |                                                   |  |  |  |  |  |               |  |
|                                                 |  |                                                   |  |  |  |  |  |               |  |
|                                                 |  |                                                   |  |  |  |  |  |               |  |
|                                                 |  |                                                   |  |  |  |  |  |               |  |
|                                                 |  |                                                   |  |  |  |  |  |               |  |
|                                                 |  |                                                   |  |  |  |  |  |               |  |
|                                                 |  |                                                   |  |  |  |  |  |               |  |
|                                                 |  |                                                   |  |  |  |  |  |               |  |
|                                                 |  |                                                   |  |  |  |  |  |               |  |
|                                                 |  |                                                   |  |  |  |  |  |               |  |
|                                                 |  |                                                   |  |  |  |  |  |               |  |
|                                                 |  |                                                   |  |  |  |  |  |               |  |
|                                                 |  |                                                   |  |  |  |  |  |               |  |
|                                                 |  |                                                   |  |  |  |  |  |               |  |
|                                                 |  |                                                   |  |  |  |  |  |               |  |
|                                                 |  |                                                   |  |  |  |  |  |               |  |
|                                                 |  |                                                   |  |  |  |  |  |               |  |
|                                                 |  |                                                   |  |  |  |  |  |               |  |
|                                                 |  |                                                   |  |  |  |  |  |               |  |
|                                                 |  |                                                   |  |  |  |  |  |               |  |
|                                                 |  |                                                   |  |  |  |  |  |               |  |
|                                                 |  |                                                   |  |  |  |  |  |               |  |
|                                                 |  |                                                   |  |  |  |  |  |               |  |
|                                                 |  |                                                   |  |  |  |  |  |               |  |
|                                                 |  |                                                   |  |  |  |  |  |               |  |
|                                                 |  |                                                   |  |  |  |  |  |               |  |
|                                                 |  |                                                   |  |  |  |  |  |               |  |
|                                                 |  |                                                   |  |  |  |  |  |               |  |
|                                                 |  |                                                   |  |  |  |  |  |               |  |
|                                                 |  |                                                   |  |  |  |  |  |               |  |
|                                                 |  |                                                   |  |  |  |  |  |               |  |
|                                                 |  |                                                   |  |  |  |  |  |               |  |
|                                                 |  |                                                   |  |  |  |  |  |               |  |
|                                                 |  |                                                   |  |  |  |  |  |               |  |
|                                                 |  |                                                   |  |  |  |  |  |               |  |
|                                                 |  |                                                   |  |  |  |  |  |               |  |
|                                                 |  |                                                   |  |  |  |  |  |               |  |
|                                                 |  |                                                   |  |  |  |  |  |               |  |
|                                                 |  |                                                   |  |  |  |  |  |               |  |
|                                                 |  |                                                   |  |  |  |  |  |               |  |
|                                                 |  |                                                   |  |  |  |  |  |               |  |
|                                                 |  |                                                   |  |  |  |  |  |               |  |
|                                                 |  |                                                   |  |  |  |  |  |               |  |
|                                                 |  |                                                   |  |  |  |  |  |               |  |
|                                                 |  |                                                   |  |  |  |  |  |               |  |
|                                                 |  |                                                   |  |  |  |  |  |               |  |
|                                                 |  |                                                   |  |  |  |  |  |               |  |
|                                                 |  |                                                   |  |  |  |  |  |               |  |
|                                                 |  |                                                   |  |  |  |  |  |               |  |
|                                                 |  |                                                   |  |  |  |  |  |               |  |
|                                                 |  |                                                   |  |  |  |  |  |               |  |
|                                                 |  |                                                   |  |  |  |  |  |               |  |
|                                                 |  |                                                   |  |  |  |  |  |               |  |
|                                                 |  |                                                   |  |  |  |  |  |               |  |
|                                                 |  |                                                   |  |  |  |  |  |               |  |
|                                                 |  |                                                   |  |  |  |  |  |               |  |
|                                                 |  |                                                   |  |  |  |  |  |               |  |
|                                                 |  |                                                   |  |  |  |  |  |               |  |
|                                                 |  |                                                   |  |  |  |  |  |               |  |
|                                                 |  |                                                   |  |  |  |  |  |               |  |
|                                                 |  |                                                   |  |  |  |  |  |               |  |
|                                                 |  |                                                   |  |  |  |  |  |               |  |
|                                                 |  |                                                   |  |  |  |  |  |               |  |
|                                                 |  |                                                   |  |  |  |  |  |               |  |
|                                                 |  |                                                   |  |  |  |  |  |               |  |
|                                                 |  |                                                   |  |  |  |  |  |               |  |
|                                                 |  |                                                   |  |  |  |  |  |               |  |
|                                                 |  |                                                   |  |  |  |  |  |               |  |
|                                                 |  |                                                   |  |  |  |  |  |               |  |
|                                                 |  |                                                   |  |  |  |  |  |               |  |
|                                                 |  |                                                   |  |  |  |  |  |               |  |
|                                                 |  |                                                   |  |  |  |  |  |               |  |
|                                                 |  |                                                   |  |  |  |  |  |               |  |
|                                                 |  |                                                   |  |  |  |  |  |               |  |
|                                                 |  |                                                   |  |  |  |  |  |               |  |
|                                                 |  |                                                   |  |  |  |  |  |               |  |
|                                                 |  |                                                   |  |  |  |  |  |               |  |
|                                                 |  |                                                   |  |  |  |  |  |               |  |
|                                                 |  |                                                   |  |  |  |  |  |               |  |
|                                                 |  |                                                   |  |  |  |  |  |               |  |
|                                                 |  |                                                   |  |  |  |  |  |               |  |
|                                                 |  |                                                   |  |  |  |  |  |               |  |
|                                                 |  |                                                   |  |  |  |  |  |               |  |
